# Supplementary material for: Hydrogen Evolution Reaction, Electrochemical CO2 Reduction, and Oxidative Photodegradation of Organic Dyes Catalyzed by Co(II) Trimethoxy-Meso-Arylporphyrin
Source: MDPI journal article supplement (doi:10.3390/inorganics11010006), 2022-12-22
Supplement: s1 [file s1]

Supplementary Materials  
for  
Hydrogen Evolution Reaction, Electrochemical Reduction of CO<sub>2</sub> and Oxidative  
Photodegradation of Organic Dyes Catalyzed by  
Co(II) trimethoxy-*meso*-arylporphyrin

Mouhieddinne Guergueb <sup>1,\*</sup>, Azhar Kechiche <sup>1</sup>, Frédérique Loiseau <sup>2</sup>, Florian Molton <sup>2</sup>, Habib Nasri <sup>1</sup>, Johannes Hohnsen <sup>3</sup>, Axel Klein <sup>3,\*</sup>

<sup>1</sup> University of Monastir, Laboratory of Physical Chemistry of Materials, Faculty of Sciences of Monastir, Avenue de l'Environnement, 5019 Monastir, Tunisia

<sup>2</sup> Département de Chimie Moléculaire, Univ. Grenoble Alpes, CS 40700, Cedex 9, 38058 Grenoble, France

<sup>3</sup> University of Cologne, Faculty of Mathematics and Natural Sciences, Department of Chemistry, Institute for Inorganic Chemistry, Greinstrasse 6, 50939 Cologne, Germany

\* Corresponding authors: Dr. Mouhieddinne Guergueb, email: mouhieddinneguergueb@gmail.com; Prof. Dr. Axel Klein, email: axel.klein@uni-koeln.de

**contents:**

**Figure S1.** FT-IR spectra of powder samples of H<sub>2</sub>TTMPP and [Co(TTMPP)].

**Figure S2.** 500 MHz <sup>1</sup>H NMR spectrum of [Co(TTMPP)] in CDCl<sub>3</sub>.

**Figure S3.** ESI-MS(+) of [Co(TTMPP)].

**Figure S4.** CVs of [Co(TTMPP)] (1 mM) in the absence or in the presence of 1 to 3 eq. TFA in DMF at 250 mV s<sup>-1</sup> under an Ar atmosphere and blank test without catalyst.

**Figure S5.** GC trace of evolved H<sub>2</sub> gas from controlled potential electrolysis of [Co(TTMPP)] in 0.1 M *n*-Bu<sub>4</sub>NBF<sub>4</sub>/DMF under an Ar atmosphere with 3 eq. TFA or with 3 eq. HNEt<sub>3</sub><sup>+</sup>.

**Figure S6.** CVs of 1 mM solutions of [Co(TTMPP)] in 0.1 M *n*-Bu<sub>4</sub>NBF<sub>4</sub>/DMF in the absence of TFE and in the presence of 1 mM of TFE under an Ar atmosphere or under CO<sub>2</sub> atmosphere and blank test in the presence of 1 mM of TFE without catalyst.

**Figure S7.** GC trace of evolved hydrogen and CO<sub>2</sub> gas from controlled potential electrolysis (CPE) of [Co(TTMPP)] in 0.1 M *n*-Bu<sub>4</sub>NBF<sub>4</sub>/DMF under a CO<sub>2</sub> atmosphere with: 3 eq. PhOH and with 3 eq. TFE.

**Figure S8.** CVs of [Co(TTMPP)] in CO<sub>2</sub>-saturated DMF with 0.1 M *n*-Bu<sub>4</sub>NBF<sub>4</sub> and 1 eq. TFE, scan rate varying from 250 to 1000 mV·s<sup>-1</sup> and plots of (*I*<sub>cat</sub>/*I*<sub>p</sub>)<sup>2</sup> values against 1/*v*.

**Figure S9.** CVs of [Co(TTMPP)] in CO<sub>2</sub>-saturated DMF with 0.1 M *n*-Bu<sub>4</sub>NBF<sub>4</sub> and 1 eq. PhOH, scan rate varying from 250 to 1000 mV·s<sup>-1</sup> and plots of (*I*<sub>cat</sub>/*I*<sub>p</sub>)<sup>2</sup> values against 1/*v*.

**Figure S10.** UV-vis absorption spectra of an aliquot of the solution of [Co(TTMPP)] in DMF before and after a controlled-potential electrolysis, with 1 eq. PhOH or with 1 eq. TFE.

**Figure S11.** A: Evolution of the absorbance of MB over time in H<sub>2</sub>O at pH = 7 and 25 °C; 0.024 mmol [Co(TTMPP)], *C*<sub>dye</sub> = 0.05 mmol, *C*<sub>H<sub>2</sub>O<sub>2</sub></sub> = 0.06 mmol and changes in ln(*C*<sub>t</sub>/*C*<sub>0</sub>) over time for both dyes.

**Figure S12.** Consecutive runs in the photocatalytic of 0.05 mmol RhB or MB in the presence of 0.024 mmol [Co(TTMPP)] in H<sub>2</sub>O at pH = 7 and in the presence 0.06 mmol of H<sub>2</sub>O<sub>2</sub>.

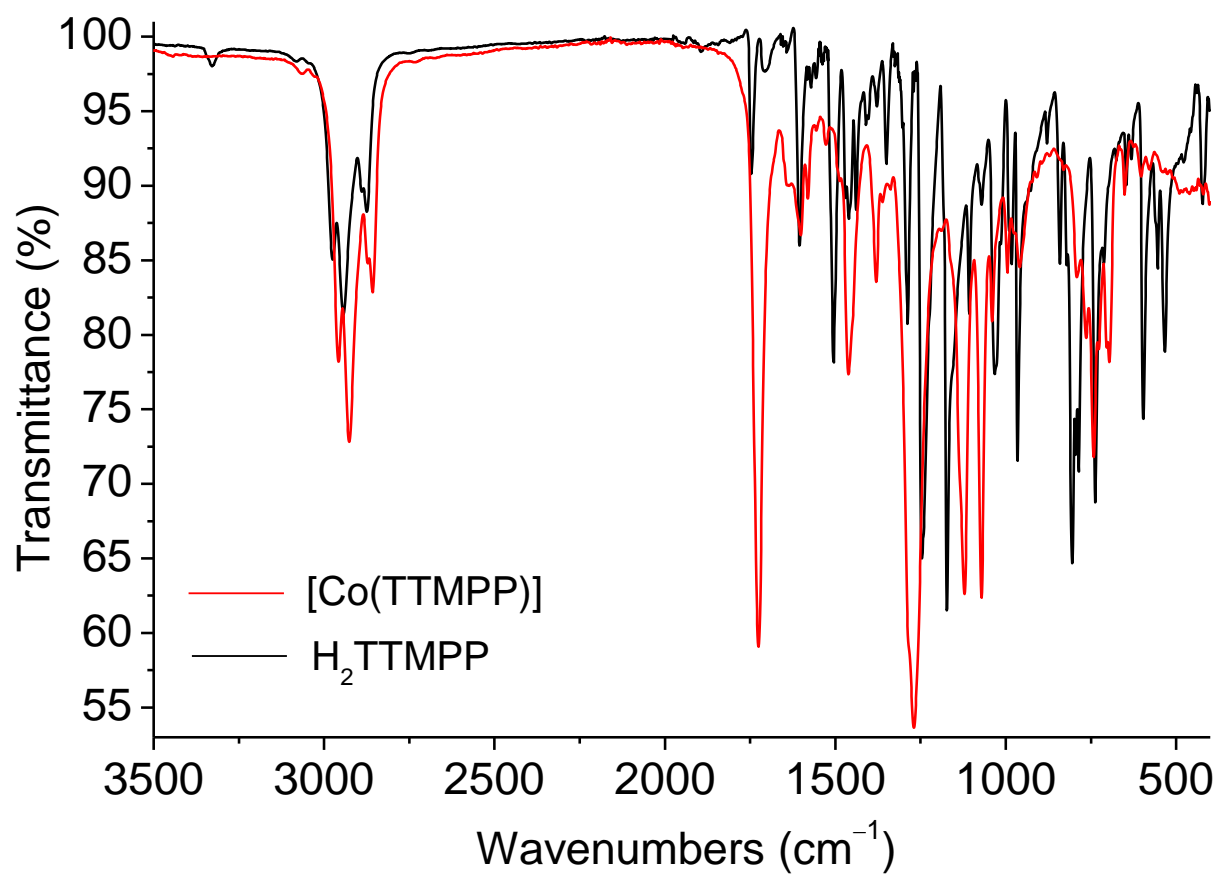

Figure S1. FT-IR spectra of powder samples of  $\text{H}_2\text{TTMPP}$  and  $[\text{Co}(\text{TTMPP})]$ .

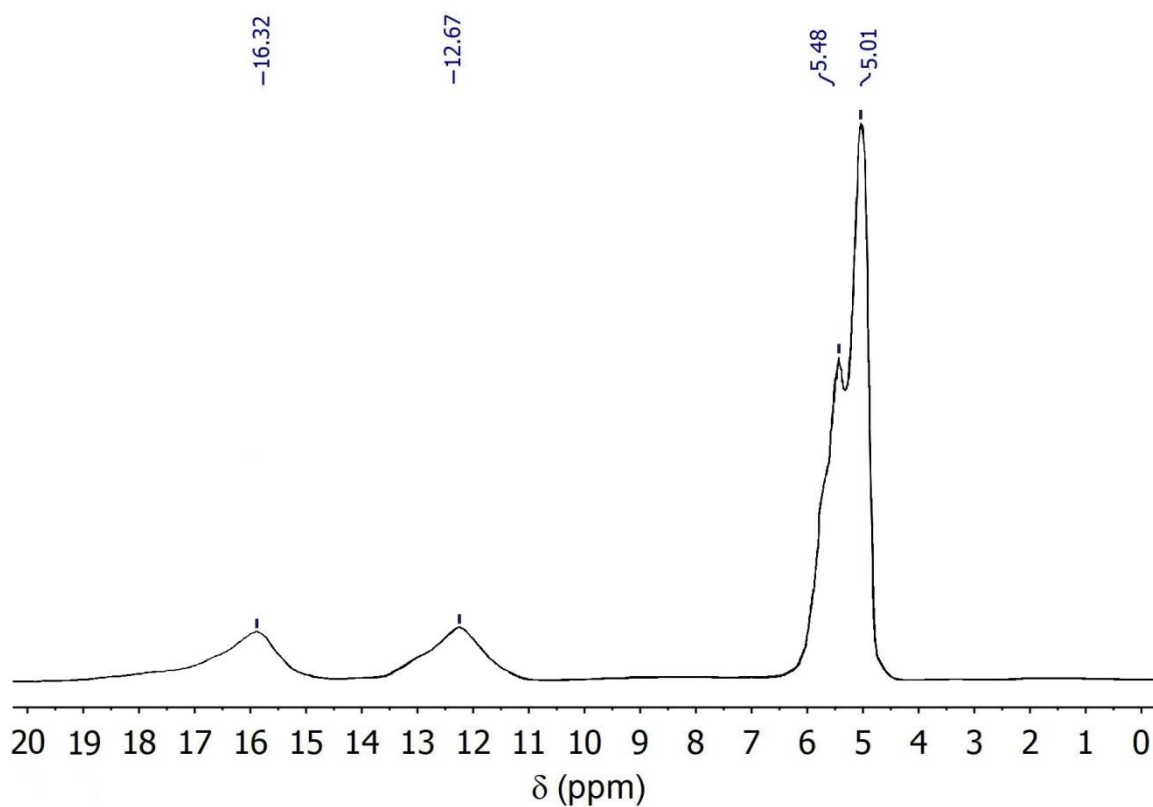

Figure S2. 500 MHz  $^1\text{H}$  NMR spectrum of  $[\text{Co}(\text{TTMPP})]$  in  $\text{CDCl}_3$ .

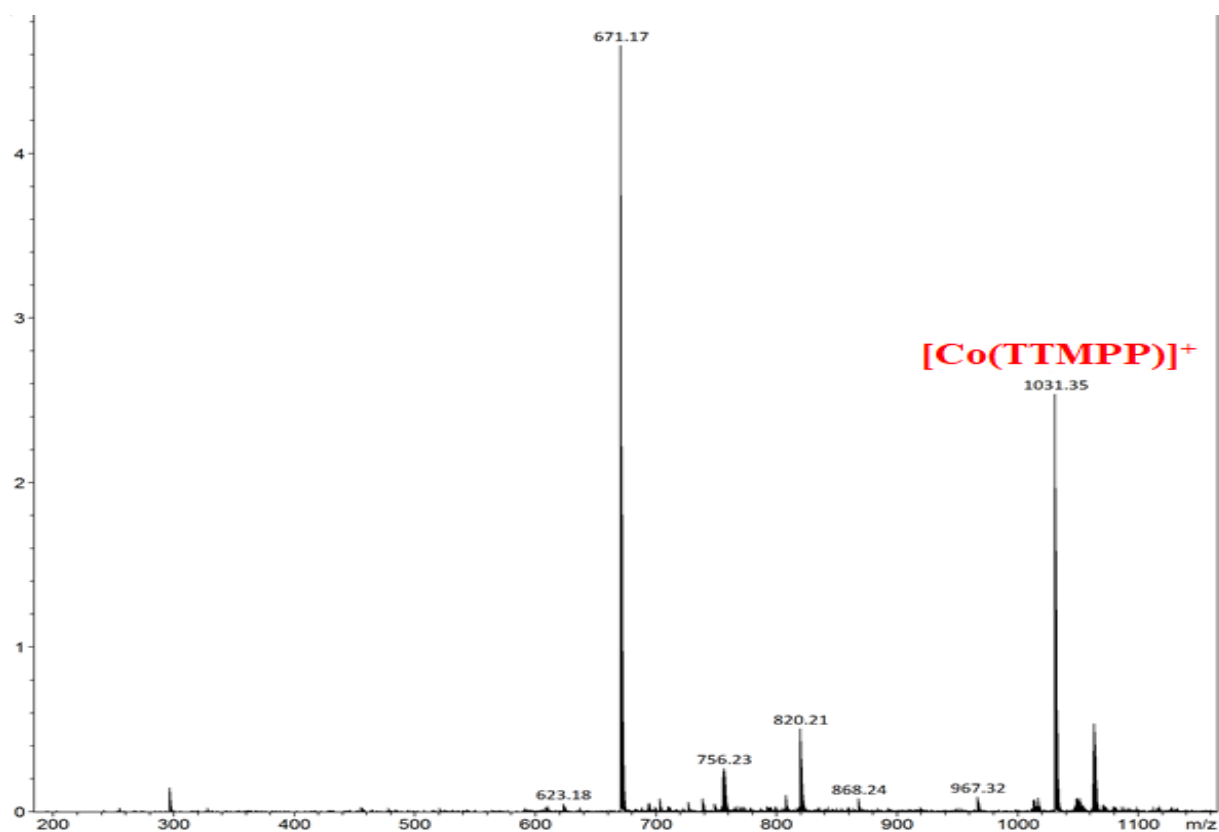

**Figure S3.** ESI-MS(+) of  $[\text{Co}(\text{TTMPP})]$ . Marked in red is the mol peak for  $[\text{M}]^+$  at 1031.35 (calc. 1031.29)  $m/z$ .

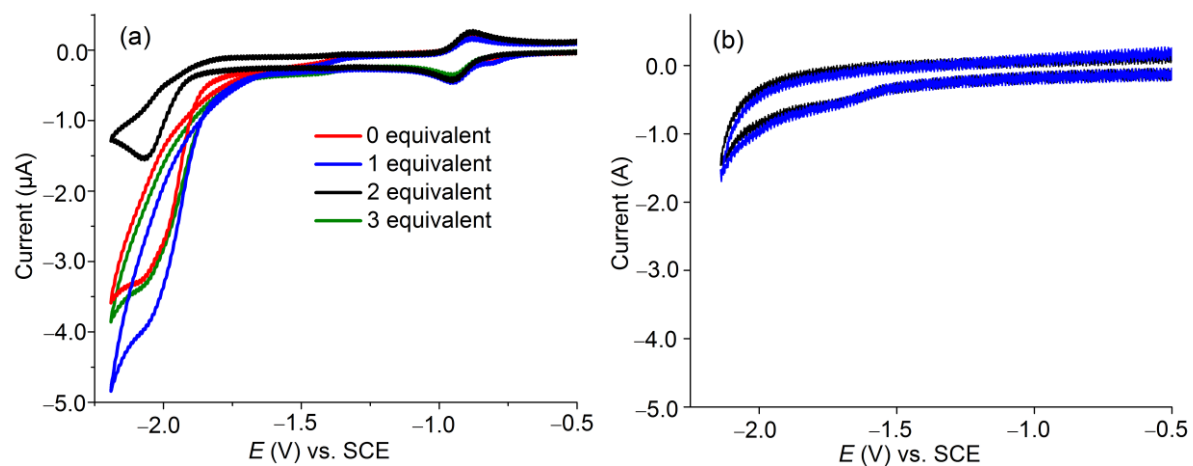

**Figure S4.** (a): CVs of  $[\text{Co}(\text{TTMPP})]$  (1 mM) in the absence (black trace) or in the presence of 1 to 3 eq. TFA in DMF at 250  $\text{mV s}^{-1}$  under an Ar atmosphere. (b): Blank test without catalyst (b).

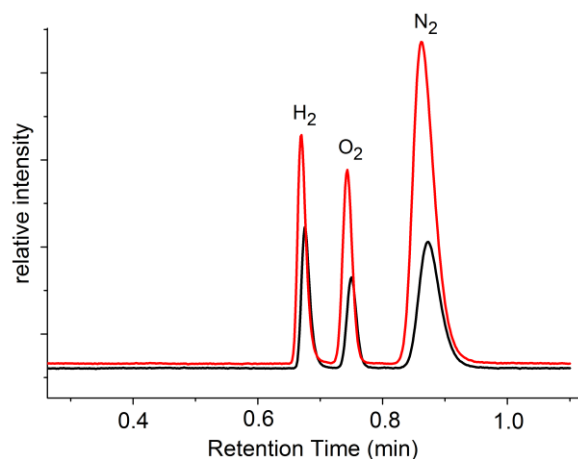

**Figure S5.** GC trace of evolved  $\text{H}_2$  gas from controlled potential electrolysis (CPE) of  $[\text{Co}(\text{TTMPP})]$  in  $0.1 \text{ M } n\text{-Bu}_4\text{NBF}_4/\text{DMF}$  under an Ar atmosphere with: (red) 3 eq. TFA and (black) with 3 eq.  $\text{HNEt}_3^+$ .

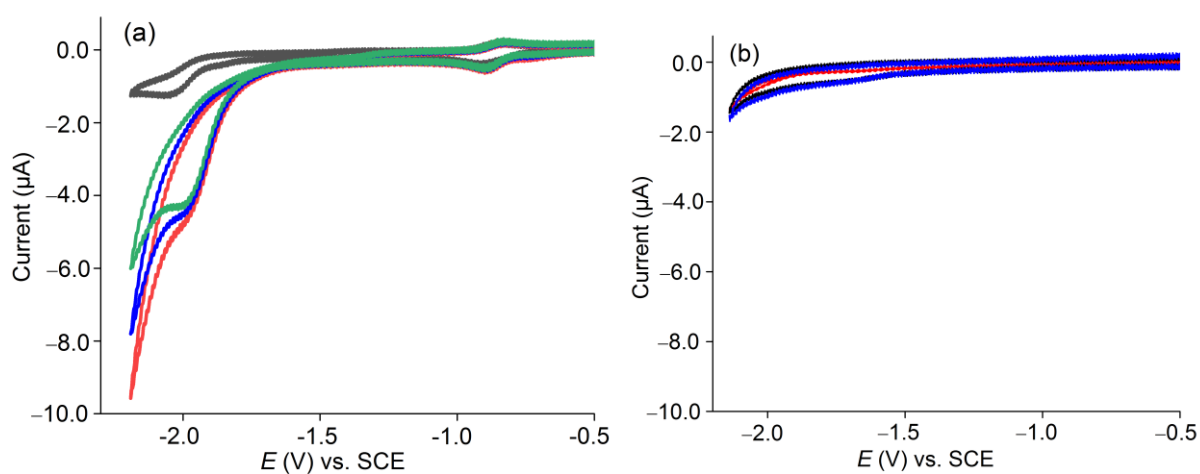

**Figure S6.** (a): CVs of  $1 \text{ mM}$  solutions of  $[\text{Co}(\text{TTMPP})]$  in  $0.1 \text{ M } n\text{-Bu}_4\text{NBF}_4/\text{DMF}$  in the absence of TFE (black: in Ar, green: in  $\text{CO}_2$ ) and in the presence of  $1 \text{ mM}$  of TFE (blue: in Ar, red: in  $\text{CO}_2$ ). (b) Blank test in the presence of  $1 \text{ mM}$  of TFE (blue: in Ar, red: in  $\text{CO}_2$ ) without catalyst.

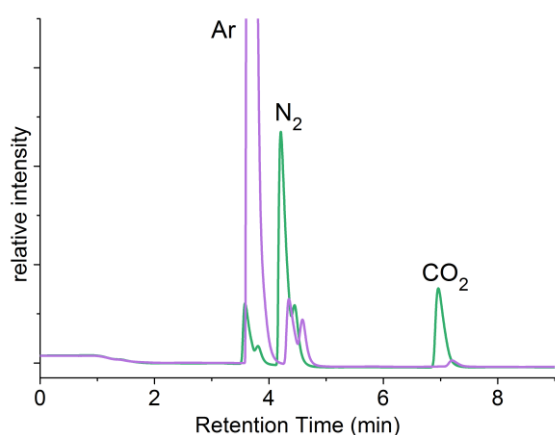

**Figure S7.** GC trace of evolved hydrogen and  $\text{CO}_2$  gas from controlled potential electrolysis (CPE) of  $[\text{Co}(\text{TTMPP})]$  in  $0.1 \text{ M } n\text{-Bu}_4\text{NBF}_4/\text{DMF}$  under a  $\text{CO}_2$  atmosphere with: (purple) 3 eq. PhOH and (green) with 3 eq. TFE.

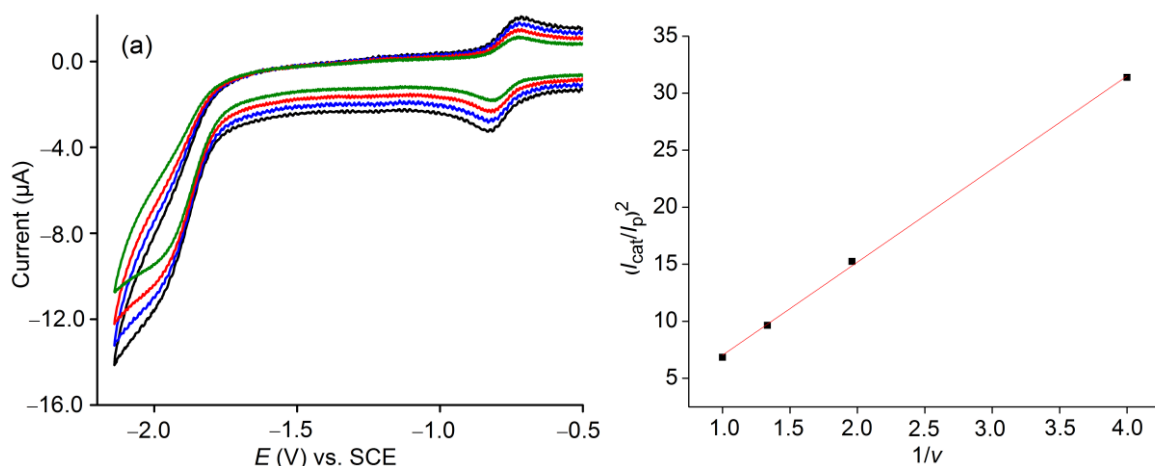

**Figure S8.** (a): CVs of [Co(TTMPP)] in CO<sub>2</sub>-saturated DMF with 0.1 M *n*-Bu<sub>4</sub>NBF<sub>4</sub> and 1 eq. TFE, scan rate varying from 250 to 1000 mV·s<sup>-1</sup>. (b): Plots of  $(I_{\text{cat}}/I_p)^2$  values against  $1/v$ . The catalytic rate constant with 1 eq. TFE was calculated from the slope using equation 3 (see manuscript text).

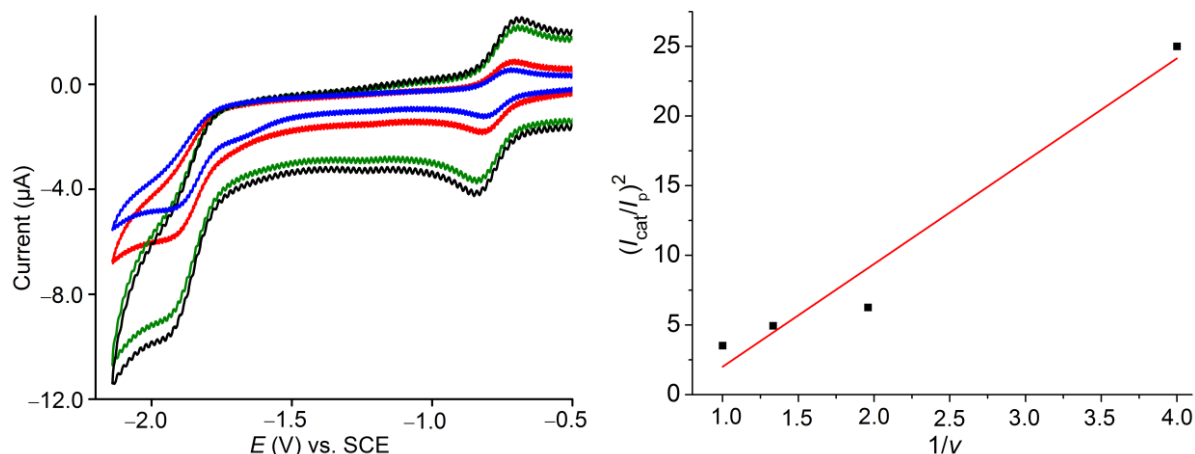

**Figure S9.** (a): CVs of [Co(TTMPP)] in CO<sub>2</sub>-saturated DMF with 0.1 M *n*-Bu<sub>4</sub>NBF<sub>4</sub> and 1 eq. PhOH, scan rate varying from 250 to 1000 mV·s<sup>-1</sup>. (b): Plots of  $(I_{\text{cat}}/I_p)^2$  values against  $1/v$ . The apparent catalytic rate constant of [Co(TTMPP)] with 1 eq. PhOH was calculated from the slope using equation 3 (see manuscript text).

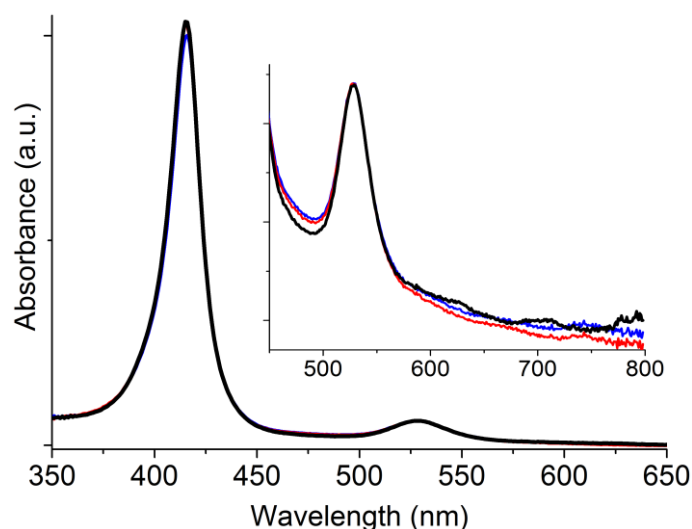

**Figure S10.** UV-vis absorption spectra of an aliquot of the solution of [Co(TTMPP)] in DMF before (black) and after a controlled-potential electrolysis, with 1 eq. PhOH (red) or with 1 eq. TFE (blue).

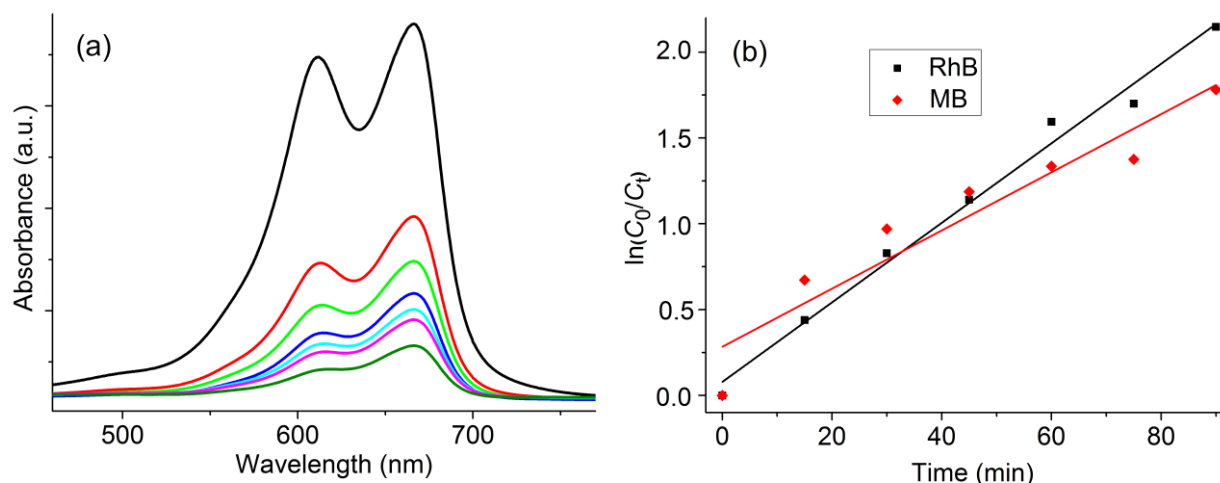

**Figure S11.** (a): Evolution of the absorbance of MB (over time (black (reference), red (15 min after addition of H<sub>2</sub>O<sub>2</sub>), green (30 min), blue (45 min), cyan (60 min), pink (75 min), olive (90 min) in H<sub>2</sub>O at pH = 7 and 25 °C; 0.024 mmol [Co(TTMPP)],  $C_{\text{dye}} = 0.05$  mmol,  $C_{\text{H}_2\text{O}_2} = 0.06$  mmol. (b): Changes in  $\ln(C_0/C_t)$  over time for both dyes.

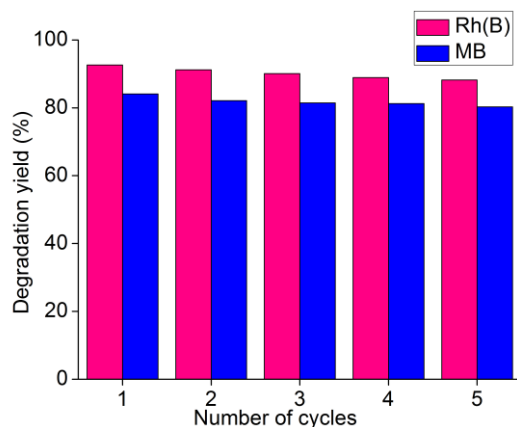

**Figure S12.** Consecutive runs in the photocatalytic of 0.05 mmol RhB or MB in the presence of 0.024 mmol [Co(TTMPP)] in H<sub>2</sub>O at pH = 7 (right) and in the presence 0.06 mmol of H<sub>2</sub>O<sub>2</sub>. After each cycle the material was recovered and re-used (experimental details in the manuscript).
